# Supplementary material for: Identification of a novel functional JAK1 S646P mutation in acute lymphoblastic leukemia
Source: PubMed Central journal article supplement (PMC5471003; doi:10.18632/oncotarget.16670), 2017-03-29
Supplement: oncotarget-08-34687-s001.pdf [file oncotarget-08-34687-s001.pdf]

# Identification of a novel functional JAK1 S646P mutation in acute lymphoblastic leukemia

## Supplementary Materials

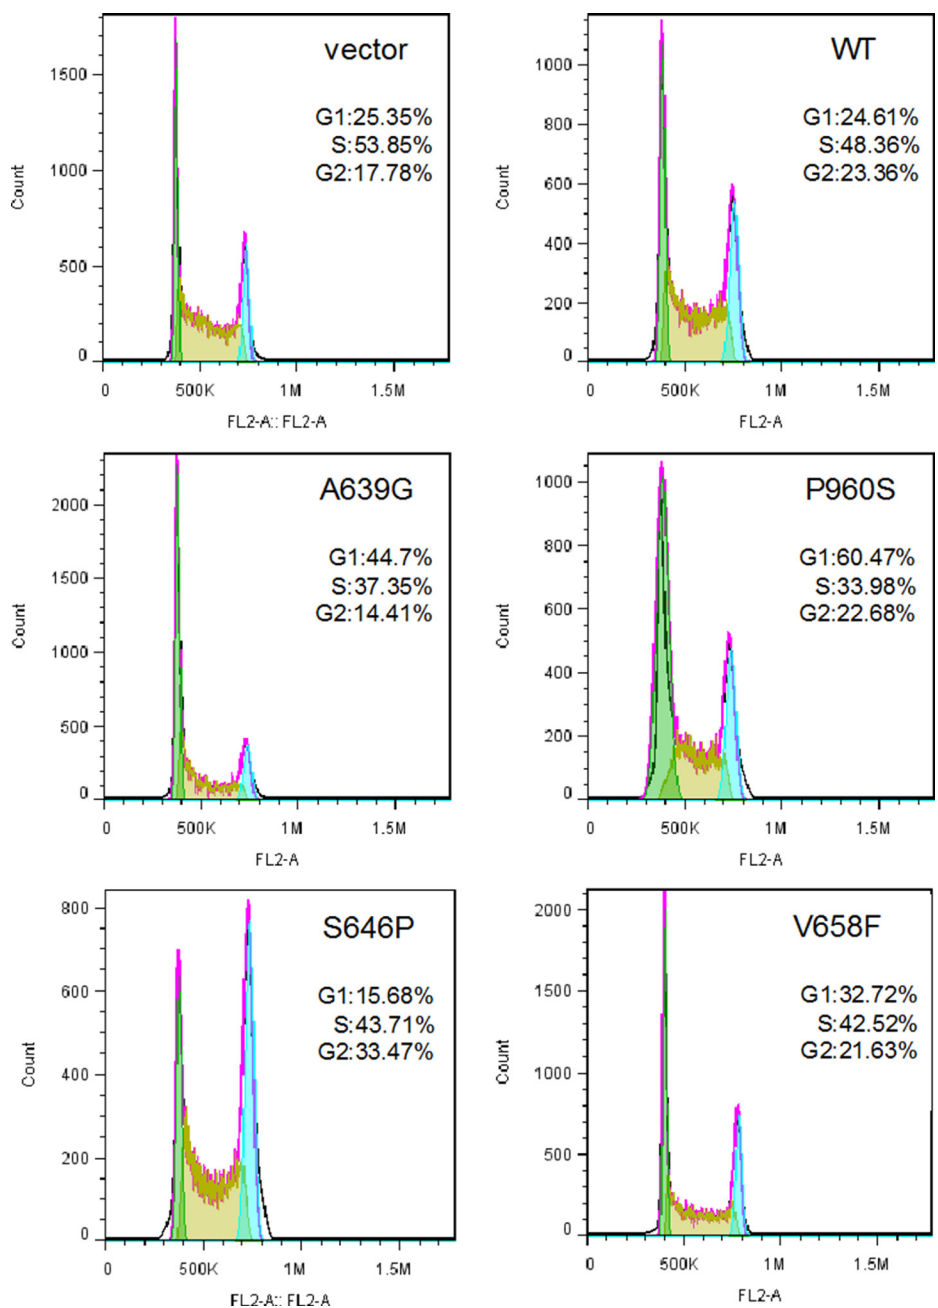

**Supplementary Figure 1: Cell cycle histograms of transduced NALM-6 cells.** Cell cycle histograms of transduced NALM-6 cells were assayed by flow cytometry. Numbers indicate the percentage of cells in different phases of cell cycle.

**Supplementary Table 1: Validated candidate genes selected from whole-exome sequencing data**

| Chromosome | Position  | Gene    | Normal/Variant | Amino acid site | Amino acid substitution |
|------------|-----------|---------|----------------|-----------------|-------------------------|
| 11         | 228474654 | OBSCN   | T/A            | 3337            | L/H                     |
|            | 228529847 |         | C/T            | 6733            | A/V                     |
| 19         | 1116897   | SBNO2   | C/T            | 602             | G/D                     |
|            | 1112893   |         | T/C            | 775             | E/G                     |
| 1          | 65316494  | JAK1    | A/G            | 583             | L/P                     |
|            | 65312383  |         | A/G            | 646             | S/P                     |
| X          | 39913526  | BCOR    | T/C            | 1601            | Y/C                     |
| 11         | 9598724   | WEE1    | T/A            | 352             | V/E                     |
| 1          | 204495527 | MDM4    | G/A            | 40              | A/T                     |
| X          | 54359928  | WNK3    | C/A            | 60              | R/L                     |
| 3          | 193854778 | HES1    | C/T            | 78              | A/V                     |
| 12         | 7947092   | NANOG   | A/T            | 152             | R/W                     |
| 3          | 45153637  | CDCP1   | A/G            | 198             | L/P                     |
| 17         | 33267588  | CCT6B   | A/G            | 313             | L/P                     |
| 19         | 2191137   | DOT1L   | T/C            | 131             | F/L                     |
|            | 2191146   |         | G/A            | 134             | E/K                     |
|            | 2211209   |         | T/C            | 488             | L/P                     |
| X          | 70316698  | FOXO4   | C/A            | 107             | A/E                     |
| 16         | 89345527  | ANKRD11 | A/G            | 2475            | S/P                     |
| 4          | 40245187  | RHOH    | G/A            | 61              | G/S                     |
| 3          | 49722460  | MST1    | T/A            | 536             | Q/L                     |
| 8          | 22862925  | RHOBTB2 | T/C            | 100             | V/A                     |
| 1          | 214567111 | PTPN14  | C/A            | 286             | E/*                     |
| 16         | 3778156   | CREBBP  | G/A            | 2328            | Q/*                     |
| 3          | 10076890  | FANCD2  | A/T            | 137             | K/N                     |
| 3          | 172523578 | ECT2    | C/T            | 691             | R/*                     |
| 17         | 18140964  | LLGL1   | A/T            | 594             | Q/L                     |
| X          | 128599865 | SMARCA1 | T/C            | 925             | R/G                     |
| 19         | 17953872  | JAK3    | T/A            | 177             | Q/L                     |

**Supplementary Table 2: All SNVs from whole-exome sequencing data.** See Supplementary\_Table\_2

**Supplementary Table 3: Genetic characteristics of the 209 patients with ALL.** See Supplementary\_Table\_3
